# Supplementary material
Source: PubMed Central journal article supplement (PMC4195773)
Supplement: embj0033-2069-sd1.pdf [file embj0033-2069-sd1.pdf]

## Supplementary information

### Figure S1. Cantharidin specifically inhibits PP2A activity.

A. Wild type Col-0 plants were treated with mock, 1  $\mu\text{M}$  flg22 or 50  $\mu\text{M}$  cantharidin. Pictures of treated leaves were taken 4 days post-infiltration.

B. BAK1-associated PP2A activity is inhibited by cantharidin. PP2A activity in Col-0 seedlings was measured by colorimetry on protein extracts enriched with anti-BAK1 and supplemented with mock or 50  $\mu\text{M}$  cantharidin. PP2A activity relative to background detected in non-enriched protein extracts (control) is presented as average of two biological repeats  $\pm$  SE. Similar enrichment of BAK1 protein (bottom panel) was assessed by immunoblot in the same samples.

### Figure S2. PP2A gene expression profile in response to biotic stresses.

A. Data were extracted from the publicly available micro-array database (eFP browser; [http://bar.utoronto.ca/efp/cgi-bin/efpWeb.cgi?dataSource=Biotic\\_Stress](http://bar.utoronto.ca/efp/cgi-bin/efpWeb.cgi?dataSource=Biotic_Stress)) and presented as ratio normalized to respective mock treated sample. Flg22: infiltration of 1  $\mu\text{M}$  bacterial-derived elicitor flg22; HrpZ: infiltration of 10  $\mu\text{M}$  bacterial-derived HrpZ; LPS: infiltration of 100  $\mu\text{g/ml}$  bacterial-derived lipopolysaccharide; NPP1: infiltration of 1  $\mu\text{M}$  oomycete-derived GST-NPP1; hrcC: infiltration of *Pseudomonas syringae* pv. *tomato* DC3000 *hrcC* at  $10^8$  cfu.mL<sup>-1</sup>; DC3000: infiltration of *Pseudomonas syringae* pv. *tomato* DC3000 at  $10^8$  cfu.mL<sup>-1</sup>; Psp: infiltration of *Pseudomonas syringae* pv. *phaseolicola* at  $10^8$  cfu.mL<sup>-1</sup>. Red and green colors indicate respectively increased or reduced gene expression compared to mock treated sample.

B. The phylogenetic tree of PP2A-B' subunits was obtained following MUSCLE alignment of protein sequences by neighbor-joining method. Number on each branch indicates number of substitution per site.

### Figure S3. Genetic characterization of the *pp2a* mutants used in this study.

A. Identification number and references for each T-DNA insertion line used in this study.

B. *PP2A* gene expression in corresponding *pp2a* mutants was assessed by qRT-PCR with primers designed after the T-DNA insertion for each lines. Normalized values are presented relative to *PP2A* gene expression in Col-0.

**Figure S4. Overexpression of PP2A suppresses PAMP-triggered ROS burst.**

ROS production in response to increasing elf18 concentration was measured in 5 week-old *rcn1-1* mutant and *rcn1-1/RCN1<sub>pro</sub>:RCN1-YFP* complemented line compared to respective wild type Ws-4. Values presented are average of three biological repeats  $\pm$  SE.

**Figure S5. *pp2a* mutants do not show sign of constitutive immune responses.**

A. Pictures of Col-0, *pp2a-a1*, *pp2a-c4*, *pp2a-b'η* and *pp2a-b'ζ* plants grown on soil at 21 °C for 4 weeks. Bar represents 1 cm.

B. Accumulation of marker gene transcripts *FRK1* (At2g19190) and *NHL10* (At2g35980) was assessed by qRT-PCR in un-elicited *pp2a-a1*, *pp2a-c4*, *pp2a-b'η* and *pp2a-b'ζ* seedlings. Values presented are average of three biological repeats  $\pm$  SE compared with Col-0 samples.

**Figure S6. Enhanced BR responsiveness in *pp2a* mutants.**

A-B. Accumulation of marker gene transcripts *CPD* (A) and *SAUR-AC1* (B) was assessed by qRT-PCR in Col-0, *pp2a-a1* and *pp2a-c4* seedlings 3 h after treatment with mock or 1  $\mu$ M brassinolide (BL). Prior to treatment all seedlings were incubated for 16 h with 2,5  $\mu$ M brassinazole. Values presented are average of three biological repeats  $\pm$  SE compared with mock-treated samples.

**Figure S7. PP2A activity but not its association with BAK1 is regulated by PAMPs.**

A. PP2A/BAK1 interaction was detected by co-immunoprecipitation in *rcn1-1* or *rcn1-1/RCN1<sub>pro</sub>:RCN1-YFP* protein extract enriched on GFP-Trap beads. Seedlings were treated with 100 nM elf18 for the indicated time.

B. BAK1-associated PP2A activity is attenuated by flg22. PP2A activity (top) was measured by colorimetry on Col-0 protein extract enriched with anti-BAK1 antibodies

over indicated time following 100 nM flg22 treatment. PP2A activity is presented relative to the maximum activity detected in untreated seedlings. Ligand-dependent FLS2/BAK1 dimerization (bottom) was detected by co-immunoprecipitation in the same samples.

**Table S1. Primers used to genotype *pp2a-b* mutant lines.**

**Table S2. Primers used for quantitative PCR studies.**

**A**

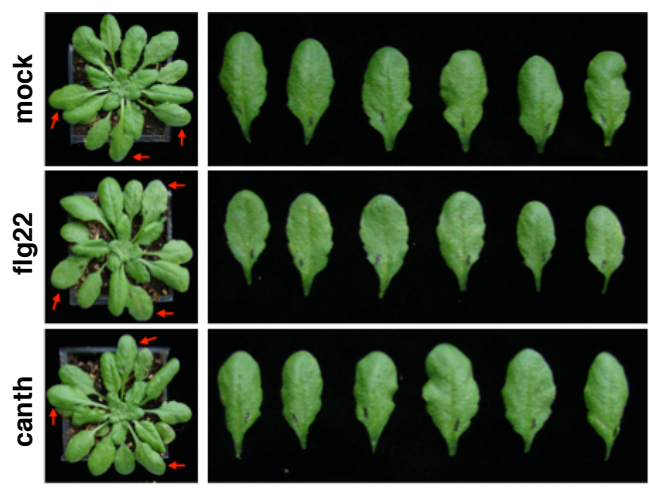

**B**

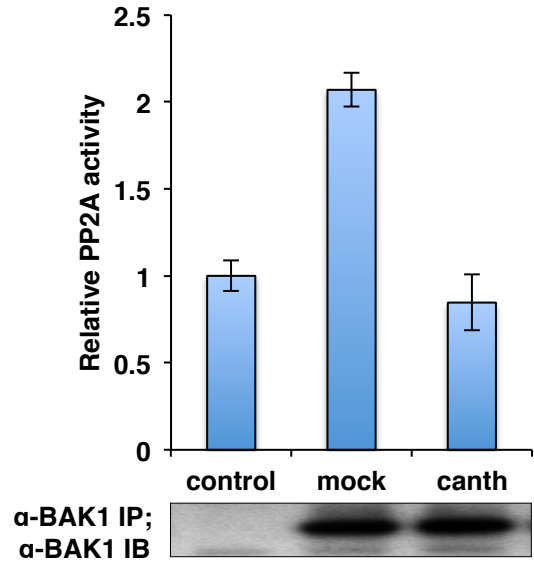

**A**

| Name           | AGI       | fig22 |     | HrpZ |     | LPS |     | NPP1 |     | hrcC  |     | DC3000 |     |     | Psp  |     |     |      |
|----------------|-----------|-------|-----|------|-----|-----|-----|------|-----|-------|-----|--------|-----|-----|------|-----|-----|------|
|                |           | 1 h   | 4 h | 1 h  | 4 h | 1 h | 4 h | 1 h  | 4 h | 2 h   | 6 h | 24 h   | 2 h | 6 h | 24 h | 2 h | 6 h | 24 h |
| A1             | At1g25490 | 0.9   | 1.0 | 1.0  | 1.1 | 1.1 | 0.9 | 0.9  | 1.1 | 0.9   | 1.1 | 0.9    | 1.0 | 0.9 | 0.9  | 0.8 | 1.1 | 0.8  |
| A2             | At3g25800 | 0.9   | 1.3 | 0.9  | 1.4 | 1.0 | 1.0 | 0.9  | 1.2 | 1.2   | 1.1 | 1.3    | 0.9 | 1.1 | 1.5  | 0.9 | 1.4 | 1.3  |
| A3             | At1g13320 | 0.9   | 1.0 | 1.0  | 0.9 | 1.0 | 1.0 | 1.0  | 0.9 | 1.0   | 1.2 | 1.0    | 1.0 | 1.1 | 0.9  | 0.9 | 1.1 | 1.0  |
| B $\alpha$     | At1g51690 | 1.1   | 0.9 | 0.9  | 0.8 | 1.2 | 1.2 | 0.6  | 0.9 | 1.3   | 0.9 | 0.9    | 1.1 | 1.1 | 1.1  | 1.0 | 1.0 | 1.0  |
| B $\beta$      | At1g17720 | 0.8   | 1.3 | 0.8  | 1.2 | 1.1 | 1.1 | 0.8  | 1.3 | 1.2   | 1.0 | 1.2    | 1.4 | 0.8 | 1.3  | 1.1 | 1.0 | 1.2  |
| B' $\alpha$    | At5g03470 | 0.7   | 1.2 | 1.3  | 1.0 | 1.1 | 1.1 | 0.8  | 0.8 | 0.9   | 1.1 | 0.8    | 0.9 | 1.3 | 1.1  | 0.9 | 0.7 | 0.8  |
| B' $\beta$     | At3g09880 | 0.9   | 1.0 | 0.9  | 1.0 | 1.0 | 1.0 | 0.8  | 1.2 | 1.1   | 0.9 | 0.8    | 1.1 | 1.1 | 1.2  | 1.1 | 0.9 | 0.9  |
| B' $\gamma$    | At4g15415 | 0.9   | 1.5 | 0.9  | 1.2 | 1.0 | 0.9 | 0.9  | 1.1 | 1.0   | 1.2 | 0.8    | 0.8 | 0.9 | 0.6  | 0.8 | 1.1 | 0.9  |
| B' $\delta$    | At3g26030 | 0.8   | 1.0 | 0.7  | 1.1 | 0.9 | 1.0 | 0.7  | 0.9 | 1.1   | 1.0 | 0.8    | 0.8 | 0.8 | 0.8  | 0.8 | 0.8 | 0.8  |
| B' $\epsilon$  | At3g54930 | 0.6   | 0.6 | 0.8  | 0.3 | 0.9 | 1.2 | 0.7  | 0.8 | 0.3   | 0.6 | 0.4    | 1.7 | 0.5 | 1.1  | 0.3 | 0.7 | 1.3  |
| B' $\eta$      | At3g26020 | 2.1   | 1.3 | 2.0  | 2.3 | 1.1 | 0.8 | 1.6  | 2.0 | 1.6   | 1.1 | 1.2    | 1.5 | 0.8 | 1.3  | 1.7 | 2.2 | 1.1  |
| B' $\zeta$     | At3g21650 | 2.0   | 1.1 | 2.1  | 2.1 | 0.9 | 1.0 | 2.0  | 2.1 | 1.2   | 1.0 | 0.9    | 1.2 | 0.8 | 0.8  | 1.6 | 1.8 | 0.9  |
| B' $\kappa$    | At5g25510 | 1.0   | 1.2 | 0.9  | 1.2 | 0.9 | 1.0 | 0.8  | 1.0 | 1.2   | 1.0 | 1.1    | 1.3 | 0.8 | 1.0  | 1.0 | 1.1 | 1.0  |
| B' $\theta$    | At1g13460 | 1.1   | 1.1 | 1.1  | 1.0 | 0.9 | 0.9 | 0.8  | 1.1 | 1.6   | 1.3 | 1.1    | 1.3 | 0.6 | 0.8  | 1.1 | 1.1 | 1.1  |
| B'' $\alpha$   | At5g44090 | 1.3   | 1.1 | 1.3  | 1.7 | 1.1 | 0.9 | 1.3  | 1.3 | 1.6   | 0.9 | 1.2    | 1.7 | 0.9 | 2.0  | 1.5 | 1.0 | 1.2  |
| B'' $\beta$    | At1g03960 | 1.1   | 0.9 | 1.1  | 0.8 | 0.9 | 0.9 | 0.8  | 1.2 | 1.0   | 1.3 | 0.8    | 0.9 | 1.2 | 0.7  | 1.1 | 1.4 | 0.6  |
| B'' $\gamma$   | At1g54450 | 1.3   | 0.7 | 1.4  | 0.7 | 0.8 | 0.7 | 0.6  | 1.3 | 1.0   | 1.0 | 0.7    | 1.2 | 1.1 | 0.8  | 1.2 | 1.1 | 0.8  |
| B'' $\delta$   | At5g28900 |       |     |      |     |     |     |      |     | n. d. |     |        |     |     |      |     |     |      |
| B'' $\epsilon$ | At5g28850 |       |     |      |     |     |     |      |     | n. d. |     |        |     |     |      |     |     |      |
| (B) TAP46      | At5g53000 | 1.0   | 1.9 | 1.2  | 1.9 | 1.0 | 1.2 | 0.9  | 1.4 | 1.6   | 1.1 | 1.3    | 1.7 | 0.9 | 1.2  | 1.6 | 1.4 | 1.3  |
| (B) TON2       | At5g18580 | 0.9   | 1.2 | 0.8  | 1.3 | 0.9 | 0.9 | 0.9  | 1.2 | 1.1   | 1.1 | 1.0    | 1.1 | 1.1 | 1.1  | 1.0 | 1.0 | 1.0  |
| C1             | At1g59830 | 0.9   | 1.1 | 0.9  | 1.1 | 0.9 | 0.9 | 0.9  | 0.9 | 1.0   | 1.1 | 0.9    | 0.9 | 1.8 | 1.2  | 0.8 | 1.0 | 0.9  |
| C2             | At1g10430 | 0.9   | 1.1 | 0.9  | 1.3 | 1.0 | 1.0 | 0.8  | 1.3 | 1.0   | 1.0 | 1.0    | 1.1 | 1.2 | 1.0  | 1.1 | 1.2 | 1.1  |
| C3             | At2g42500 |       |     |      |     |     |     |      |     | n. d. |     |        |     |     |      |     |     |      |
| C4             | At3g58500 |       |     |      |     |     |     |      |     | n. d. |     |        |     |     |      |     |     |      |
| C5             | At1g69960 | 1.4   | 1.3 | 1.4  | 1.6 | 1.0 | 1.0 | 1.1  | 1.2 | 1.2   | 1.3 | 1.0    | 1.1 | 0.9 | 0.9  | 1.1 | 1.5 | 1.1  |

**B**

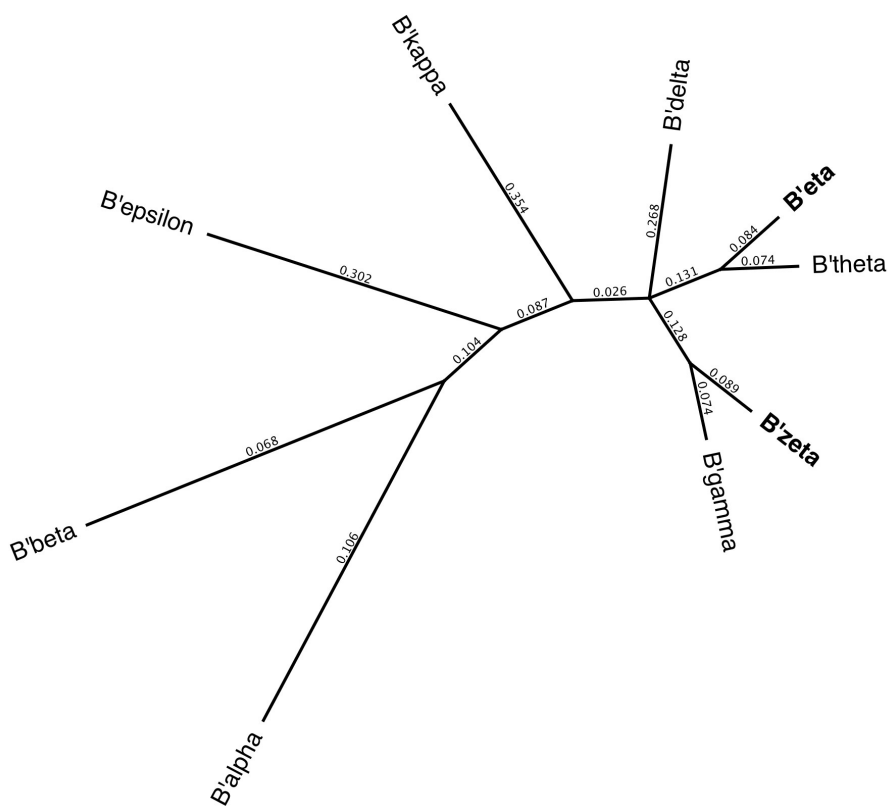

**A**

| Gene      | Name                 | Background | Line #                              | Reference                        |
|-----------|----------------------|------------|-------------------------------------|----------------------------------|
| At1g59830 | <i>c1</i>            | Col-0      | SALK_102599                         | Ballesteros <i>et al.</i> , 2013 |
| At1g10430 | <i>c2</i>            | Col-0      | Ws insertion backcrossed into Col-0 | Ballesteros <i>et al.</i> , 2013 |
| At2g42500 | <i>c3</i>            | Col-0      | SAIL_182_A02                        | Ballesteros <i>et al.</i> , 2013 |
| At3g58500 | <i>c4</i>            | Col-0      | SALK_035009                         | Ballesteros <i>et al.</i> , 2013 |
| At1g69960 | <i>c5</i>            | Col-0      | SALK_013178                         | Ballesteros <i>et al.</i> , 2013 |
| At1g25490 | <i>a1 (rcn1-6)</i>   | Col-0      | SALK_059903                         | Skottke <i>et al.</i> , 2011     |
| At1g25490 | <i>rcn1-1</i>        | Ws-4       |                                     | Deruere <i>et al.</i> , 1999     |
| At3g25800 | <i>a2 (pp2aa2-2)</i> | Col-0      | SALK_017541                         | Michniewicz <i>et al.</i> , 2007 |
| At1g13320 | <i>a3 (pp2aa3-1)</i> | Col-0      | SALK_014113                         | Michniewicz <i>et al.</i> , 2007 |
| At3g26020 | <i>b'η</i>           | Col-0      | SALK_039168                         | this study                       |
| At3g21650 | <i>b'ζ</i>           | Col-0      | SALK_107944C                        | this study                       |
| At5g44090 | <i>b''a</i>          | Col-0      | SALK_135978                         | this study                       |

**B**

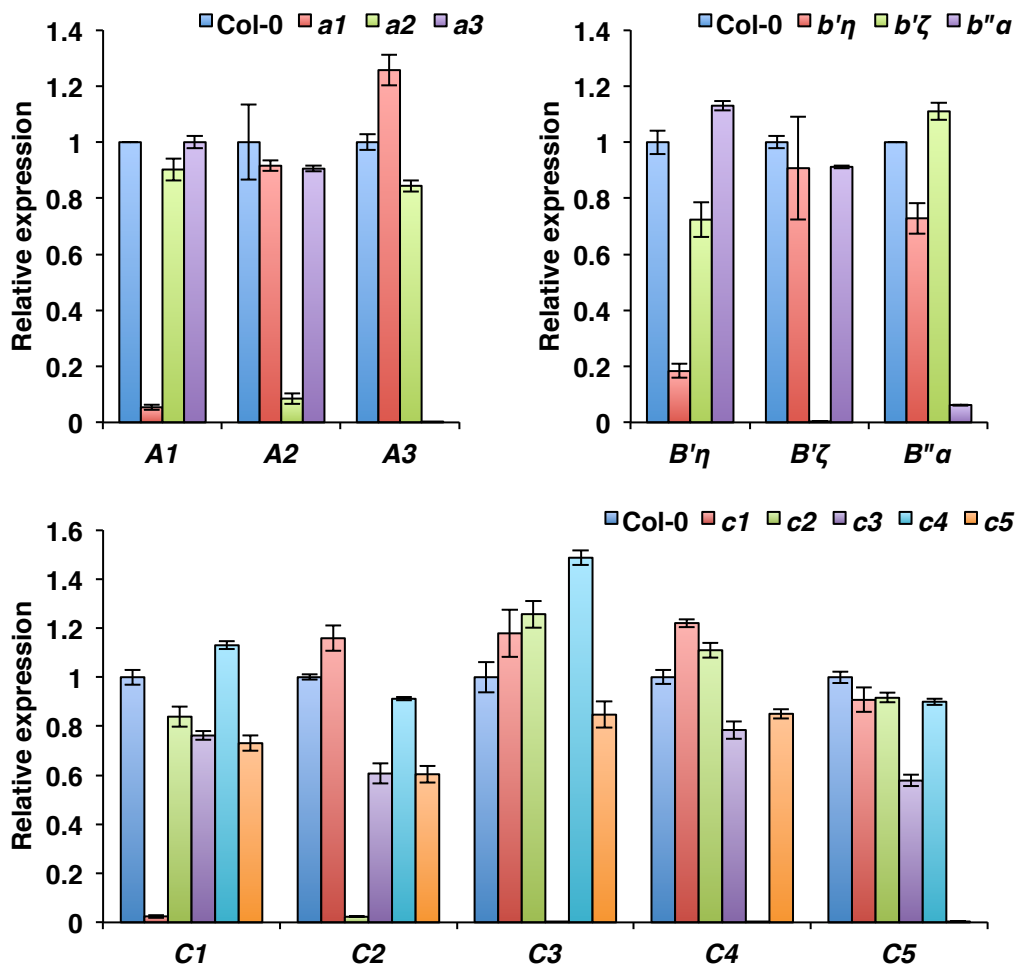

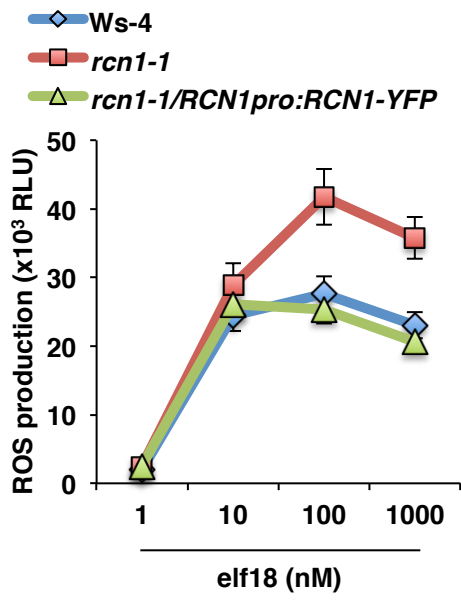

**A**

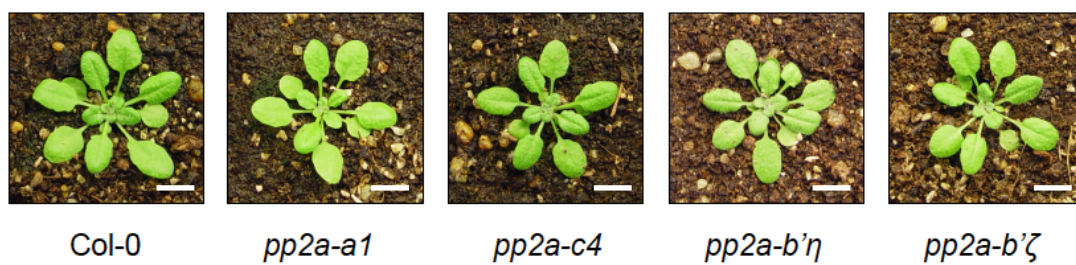

**B**

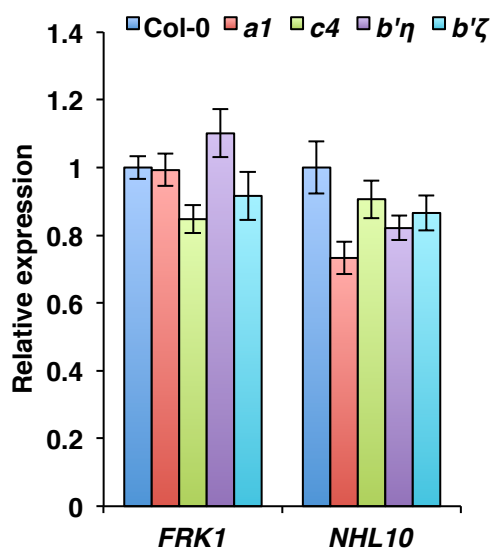



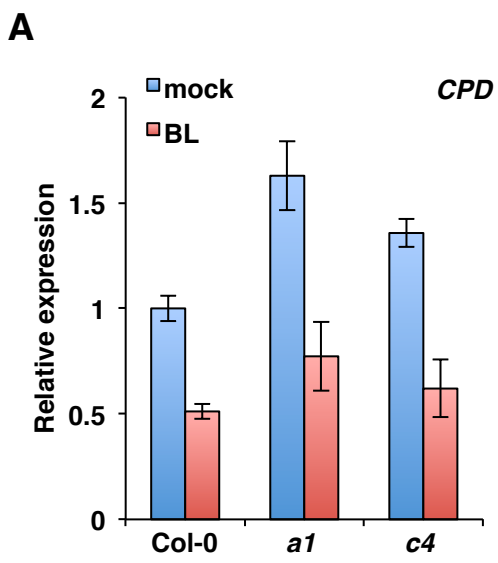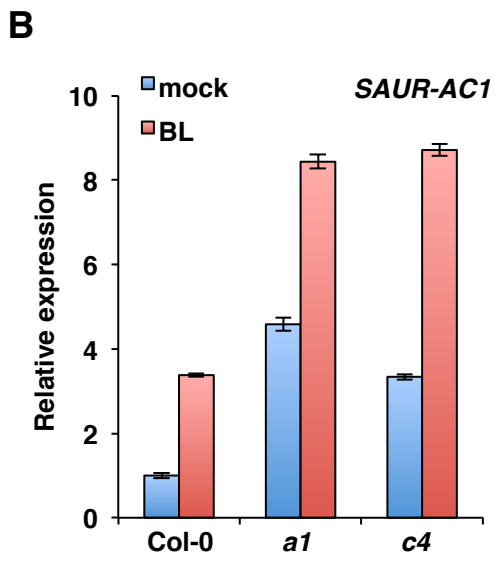

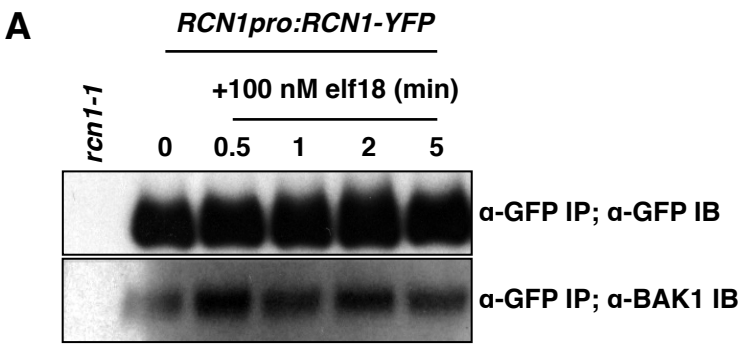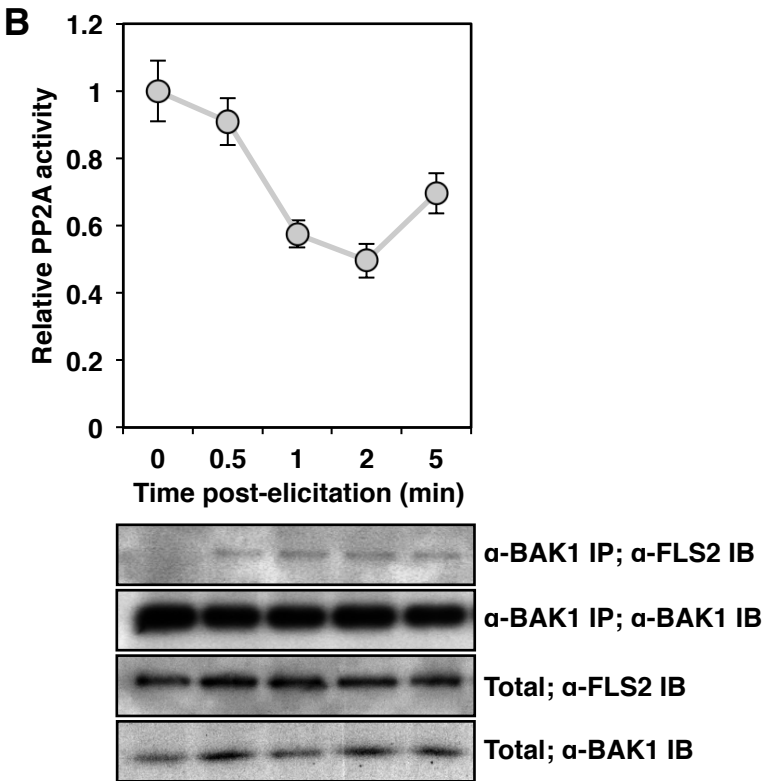

Supplementary information  
Segonzac et al., Table S1

**Table S1. Primers used to genotype *pp2a-b* mutant lines.**

| <b>Gene</b> | <b>Name</b> | <b>Line #</b> | <b>LB primer (5'&gt;3')</b> | <b>RB primer (5'&gt;3')</b> |
|-------------|-------------|---------------|-----------------------------|-----------------------------|
| At3g26020   | <i>b'η</i>  | SALK_039168   | GTATGTCGAAACGATATGGCC       | CAACAACAACAACAACAACGG       |
| At3g21650   | <i>b'ζ</i>  | SALK_107944   | CACTCGTCGAAAAGAACTTGG       | CCGAATCTCTTTATCGGGAAG       |
| At5g44090   | <i>b''α</i> | SALK_135978   | GGCATAGAAGCGTCAAACAAG       | ACTCTTCTCCCAGTGGCTTTC       |

**Table S2. Primers used for quantitative PCR studies.**

| <b>Gene</b> | <b>Name</b>  | <b>Forward primer (5'&gt;3')</b> | <b>Reverse primer (5'-&gt;3')</b> |
|-------------|--------------|----------------------------------|-----------------------------------|
| At1g25490   | <i>A1</i>    | CCAAACTCCTCTGCGAGGCGC            | AGCTCGGAGCCCTTTGCATGC             |
| At3g25800   | <i>A2</i>    | TGCGTGCGGTGTCTCTTCTTG            | AGCTCCACAAGCCCAGGACG              |
| At1g13320   | <i>A3</i>    | CGTGGCCAAAATGATGCAATCTCTC        | TAGCTCCACCAAGCATGGCCGTA           |
| At3g21650   | <i>Bζ</i>    | ACGGGAAAGGACATGGCAACGG           | GACCCTGTGGACTCAGAGCTGC            |
| At3g26020   | <i>Bη</i>    | TGAACAGTCTGCATTTTCAGGCCA         | CTCTCTCTGCAACACCTAGAGCTGA         |
| At5g44090   | <i>B"α</i>   | GGCGTTTGAAACCCGTGACCC            | GCAAATCGGTCCCATTCCGTCA            |
| At1g59830   | <i>C1</i>    | ACAGATGTGGAAACATGGCCGCA          | TGCGCGTGGTATCGGGTTTCG             |
| At1g10430   | <i>C2</i>    | TACCGGTGTGGAAACATGGCTGC          | CGAGGAGCTGGATCGAACTGGA            |
| At2g42500   | <i>C3</i>    | AAGTGCCCCATGAAGGGCCG             | CCGGCACCCCGAGGAGAGAT              |
| At3g58500   | <i>C4</i>    | GCACCGAGGAGAGGAGAGCCA            | CCGGAAGCTGCAGGAGGAGC              |
| At1g69960   | <i>C5</i>    | CGTTGTGGCAACATGGCTGCG            | TGCGAGTGGTTTTCGGGTTTCGAC          |
| At2g19190   | <i>FRK1</i>  | ATCTTCGCTTGGAGCTTCTC             | TGCAGCGCAAGGACTAGAG               |
| At2g35980   | <i>NHL10</i> | TTCCTGTCCGTAACCCAAAC             | CCCTCGTAGTAGGCATGAGC              |
| At5g15400   | <i>U-box</i> | TGCGCTGCCAGATAATACTATT           | TGCTGCCCAACATCAGGTT               |
