# Supplementary material
Source: PubMed Central journal article supplement (PMC4195773)

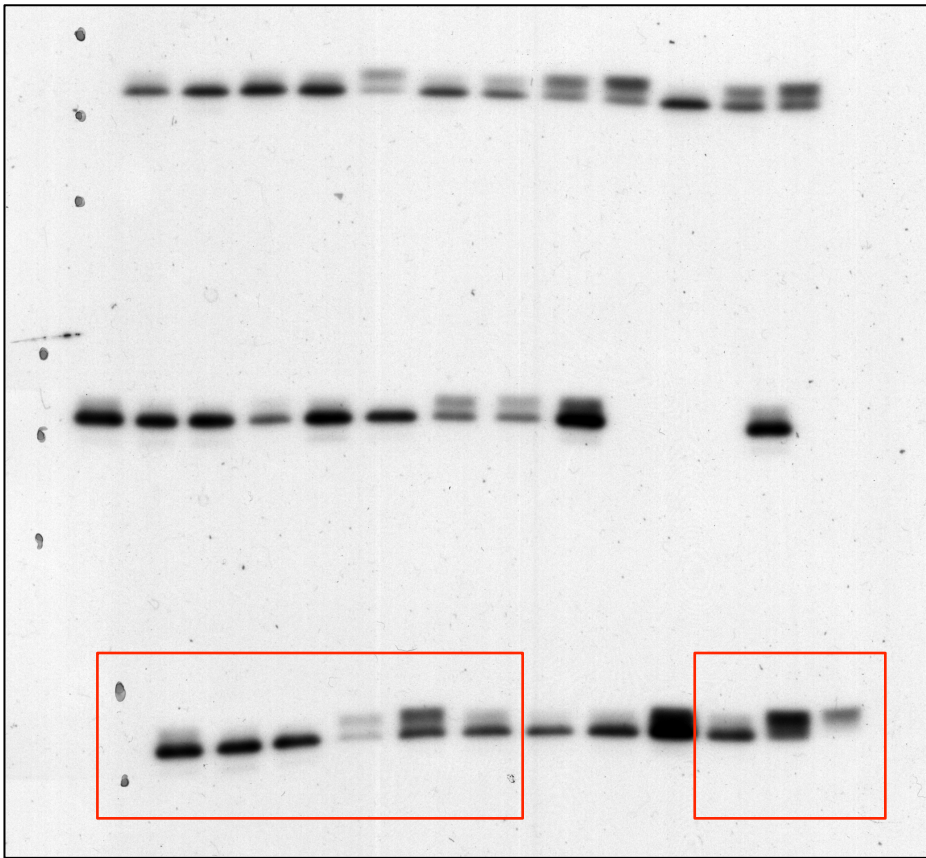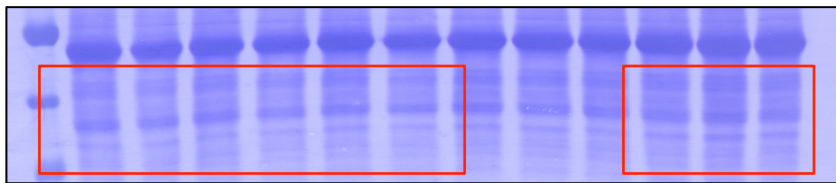

Supplement: embj0033-2069-sd3.pdf [file embj0033-2069-sd3.pdf]

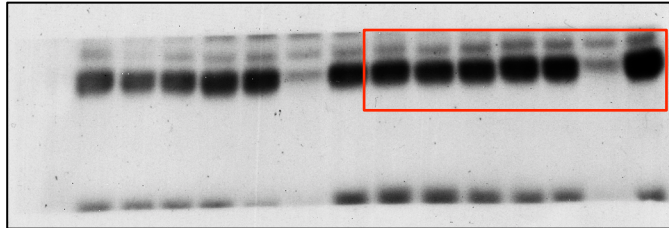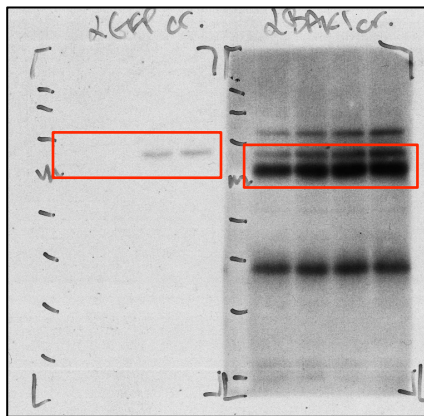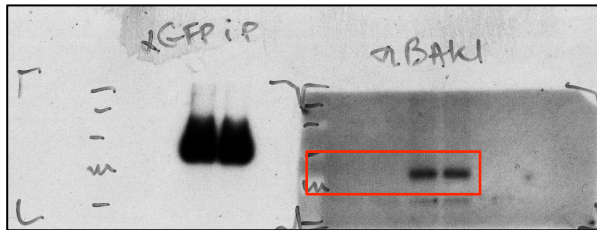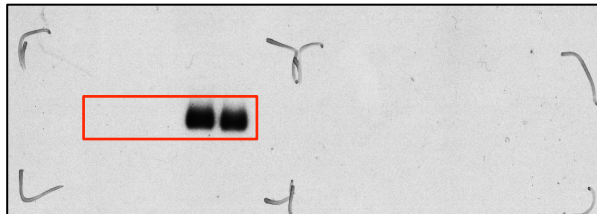

Supplement: embj0033-2069-sd4.pdf [file embj0033-2069-sd4.pdf]

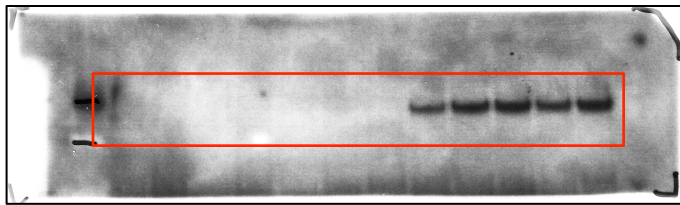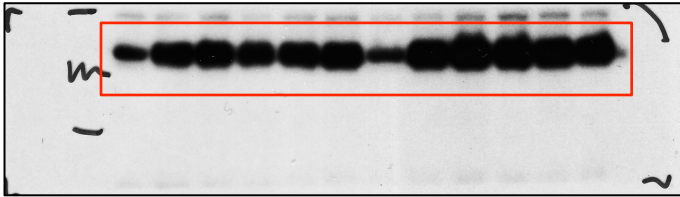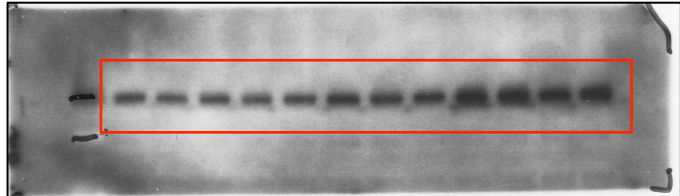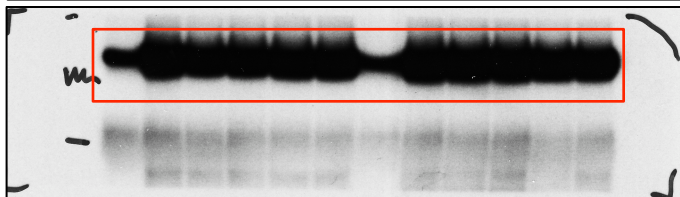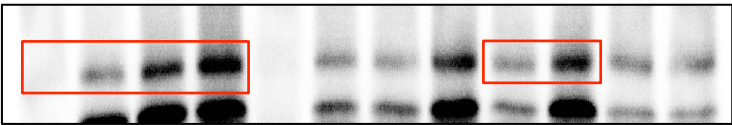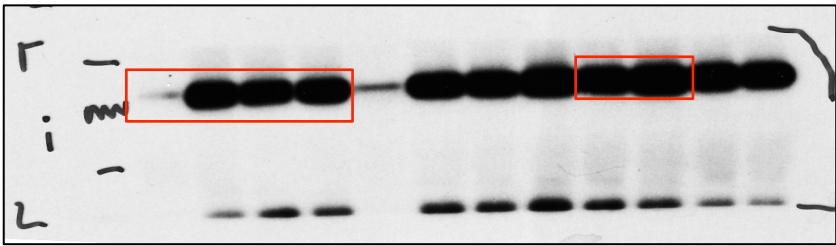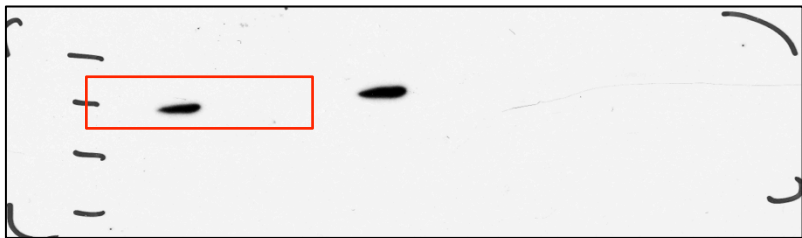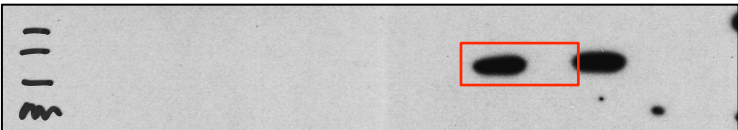

Supplement: embj0033-2069-sd5.pdf [file embj0033-2069-sd5.pdf]
